# Supplementary material
Source: PubMed Central journal article supplement (PMC5087328)
Supplement: NIHMS814913-supplement-supplement_1.pdf [file NIHMS814913-supplement-supplement_1.pdf]

Online Repository/E-Supplement

eTable 1: Proportion of parents with a positive test (SPT > 3mm, sIgE >0.35) who self-report food allergy separated by food

|        | Positive skin prick test (%) | Positive Specific IgE (%) |
|--------|------------------------------|---------------------------|
| Milk   | 27.0                         | 23.0                      |
| Soy    | 29.0                         | 29.4                      |
| Egg    | 11.8                         | 21.7                      |
| Wheat  | 30.4                         | 22.4                      |
| Fish   | 33.3                         | 72.7                      |
| Shrimp | 26.4                         | 22.4                      |
| Peanut | 24.5                         | 27.9                      |
| Sesame | 21.6                         | 27.7                      |
| Walnut | 21.2                         | 25.8                      |

eTable 2: Proportion of index children with a positive test (SPT > 3mm, sIgE >0.35) who meet stringent or probable criteria of allergy to that food

|        | Positive skin prick test (%) | Positive Specific IgE (%) |
|--------|------------------------------|---------------------------|
| Milk   | 194 (80.4)                   | 586 (49.8)                |
| Soy    | 189 (7.4)                    | 604 (6.8)                 |
| Egg    | 249 (39.4)                   | 598 (37.5)                |
| Wheat  | 34 (35.3)                    | 566 (6.7)                 |
| Fish   | 41 (22.0)                    | 77 (19.5)                 |
| Shrimp | 72 (12.5)                    | 212 (9.0)                 |
| Peanut | 477 (49.7)                   | 838 (48.6)                |
| Sesame | 231 (10.8)                   | 660 (7.0)                 |
| Walnut | 260 (29.6)                   | 505 (27.9)                |
